# Supplementary material for: Correlation of Plasma Amino Acid and Anthropometric Profiles with Brown Adipose Tissue Density in Humans
Source: MDPI journal article supplement (doi:10.3390/jcm10112339), 2021-05-27
Supplement: s1 [file s1]

**Table S1.** Results of multiple logistic regression analysis with plasma AA concentrations as the independent variable showed significant correlations with higher or lower BAT-d in men and women

|                                   | Men             |         |                        | Women           |        |                        |
|-----------------------------------|-----------------|---------|------------------------|-----------------|--------|------------------------|
|                                   | <i>P</i> -value | B       | Exp(B)                 | <i>P</i> -value | B      | Exp(B)                 |
| <b>Glycine/AAs</b>                | <b>0.043</b>    | 137.82  | 7.17×10 <sup>59</sup>  | 0.657           | -13.10 | 2.05×10 <sup>-6</sup>  |
| <b>Alanine/AAs</b>                | 0.90            | -5.20   | 0.0055                 | 0.469           | -20.12 | 1.83×10 <sup>-9</sup>  |
| <b>Valine/AAs</b>                 | 0.70            | -21.15  | 6.54×10 <sup>-10</sup> | 0.834           | -6.61  | 1.34×10 <sup>-3</sup>  |
| <b>Leucine/AAs</b>                | 0.70            | -34.46  | 1.08×10 <sup>-15</sup> | 0.481           | -55.06 | 1.22×10 <sup>-24</sup> |
| <b>Isoleucine/AAs</b>             | 0.53            | 80.32   | 7.61×10 <sup>34</sup>  | 0.311           | 104.55 | 3.93×10 <sup>-46</sup> |
| <b>Cysteine/AAs</b>               | 0.31            | -       | -                      | 0.594           | -      | 3.15×10 <sup>-</sup>   |
|                                   |                 | 1372.49 |                        |                 | 496.21 | <sup>216</sup>         |
| <b>Methionine/AAs</b>             | 0.57            | -213.02 | 3.08×10 <sup>-93</sup> | 0.290           | 281.54 | 1.87×10 <sup>122</sup> |
| <b>Serine/AAs</b>                 | 0.037           | 169.38  | 3.63×10 <sup>73</sup>  | 0.251           | 63.56  | 4.00×10 <sup>27</sup>  |
| <b>Homoserine + Threonine/AAs</b> | 0.14            | 331.32  | 7.80×10 <sup>143</sup> | 0.236           | -      | 6.38×10 <sup>-56</sup> |
|                                   |                 |         |                        |                 | 127.09 |                        |
| <b>Aspartate/AAs</b>              | 0.31            | 539.46  | 1.93×10 <sup>234</sup> | 0.681           | 117.32 | 8.98×10 <sup>50</sup>  |
| <b>Glutamate/AAs</b>              | 0.30            | 91.11   | 3.72×10 <sup>39</sup>  | 0.158           | -      | 1.30×10 <sup>-46</sup> |
|                                   |                 |         |                        |                 | 105.66 |                        |
| <b>Asparagine/AAs</b>             | 0.36            | -223.39 | 9.58×10 <sup>-98</sup> | 0.186           | 210.41 | 2.40×10 <sup>91</sup>  |
| <b>Glutamine/AAs</b>              | 0.97            | 1.37    | 3.94                   | 0.572           | -16.26 | 8.67×10 <sup>-8</sup>  |
| <b>Arginine/AAs</b>               | 0.45            | 56.02   | 2.13×10 <sup>24</sup>  | 0.792           | -17.68 | 2.10×10 <sup>-8</sup>  |
| <b>Lysine/AAs</b>                 | 0.76            | -28.35  | 4.89×10 <sup>-13</sup> | 0.103           | -      | 6.01×10 <sup>-49</sup> |
|                                   |                 |         |                        |                 | 111.03 |                        |
| <b>Histidine/AAs</b>              | 0.37            | 88.03   | 1.70×10 <sup>38</sup>  | 0.872           | -8.87  | 1.40×10 <sup>-4</sup>  |
| <b>Phenylalanine/AAs</b>          | <b>0.036</b>    | 307.70  | 4.29×10 <sup>133</sup> | 0.093           | -      | 2.82×10 <sup>-62</sup> |
|                                   |                 |         |                        |                 | 141.72 |                        |
| <b>Tyrosine/AAs</b>               | 0.53            | -78.95  | 5.13×10 <sup>-35</sup> | 0.725           | -25.97 | 5.25×10 <sup>-12</sup> |
| <b>Tryptophan/AAs</b>             | 0.36            | 122.45  | 1.51×10 <sup>53</sup>  | 0.108           | 158.29 | 5.54×10 <sup>68</sup>  |
