# Supplementary material for: Correlation of Plasma Amino Acid and Anthropometric Profiles with Brown Adipose Tissue Density in Humans
Source: MDPI journal article supplement (doi:10.3390/jcm10112339), 2021-05-27
Supplement: s1 [file s1]

**Table S3.** Results of multiple logistic regression analysis with anthropometric parameters alone, including age, %BF, and VFA, as independent variables revealed significant correlations with higher or lower BAT-d in men and women

|     | Men             |       |        | Women           |         |        |
|-----|-----------------|-------|--------|-----------------|---------|--------|
|     | <i>P</i> -value | B     | Exp(B) | <i>P</i> -value | B       | Exp(B) |
| Age | 0.58            | 0.018 | 1.018  | 0.35            | -0.037  | 0.96   |
| %BF | 0.18            | -0.10 | 0.90   | 0.017           | -0.15   | 0.86   |
| VFA | 0.10            | -     | 0.98   | 0.99            | -       | 0.999  |
|     |                 | 0.021 |        |                 | 0.00012 |        |
