# Supplementary material for: Correlation of Plasma Amino Acid and Anthropometric Profiles with Brown Adipose Tissue Density in Humans
Source: MDPI journal article supplement (doi:10.3390/jcm10112339), 2021-05-27
Supplement: s1 [file s1]

**Table S2.** Results of multiple logistic regression analysis with plasma AA concentrations and anthropometric parameters, including age, %BF, and VFA, as independent variables showed significant correlations with higher or lower BAT-d in men and women

|                            | Men             |         |                         | Women           |         |                         |
|----------------------------|-----------------|---------|-------------------------|-----------------|---------|-------------------------|
|                            | <i>P</i> -value | B       | ExP(B)                  | <i>P</i> -value | B       | ExP(B)                  |
| Glycine/AAs                | 0.18            | 133.20  | 7.02×10 <sup>57</sup>   | 0.37            | -41.81  | 6.95×10 <sup>-19</sup>  |
| Alanine/AAs                | 0.68            | 27.89   | 1.30×10 <sup>12</sup>   | 0.54            | -25.85  | 5.93×10 <sup>-12</sup>  |
| Valine/AAs                 | 0.44            | -59.01  | 2.36×10 <sup>-26</sup>  | 0.57            | 25.93   | 1.83×10 <sup>11</sup>   |
| Leucine/AAs                | 0.45            | 94.20   | 8.11×10 <sup>40</sup>   | 0.10            | -176.29 | 2.76×10 <sup>-77</sup>  |
| Isoleucine/AAs             | 0.20            | 363.64  | 8.45×10 <sup>157</sup>  | 0.46            | -95.37  | 3.82×10 <sup>-42</sup>  |
| Cysteine/AAs               | 0.77            | 548.23  | 1.24×10 <sup>238</sup>  | 0.12            | -       | -                       |
|                            |                 |         |                         |                 | 2231.44 |                         |
| Methionine/AAs             | 0.46            | -487.23 | 2.51×10 <sup>-212</sup> | 0.084           | 573.72  | 1.46×10 <sup>249</sup>  |
| Serine/AAs                 | 0.16            | 169.99  | 6.66×10 <sup>73</sup>   | 0.36            | 71.49   | 1.12×10 <sup>31</sup>   |
| Homoserine + Threonine/AAs | <b>0.038</b>    | 680.43  | 3.20×10 <sup>295</sup>  | 0.40            | -110.74 | 8.079×10 <sup>-49</sup> |
| Aspartate/AAs              | 0.24            | 1297.44 | -                       | 0.59            | 179.98  | 1.45×10 <sup>78</sup>   |
| Glutamate/AAs              | 0.40            | 117.79  | 1.43×10 <sup>51</sup>   | 0.21            | -134.36 | 4.43×10 <sup>-59</sup>  |
| Asparagine/AAs             | 0.76            | -125.30 | 3.84×10 <sup>-55</sup>  | 0.46            | 145.82  | 2.12×10 <sup>63</sup>   |
| Glutamine/AAs              | 0.76            | 22.87   | 8.55×10 <sup>9</sup>    | 0.91            | -4.88   | 7.57×10 <sup>-3</sup>   |
| Arginine/AAs               | 0.36            | -133.02 | 1.69×10 <sup>-58</sup>  | 0.19            | -131.86 | 5.42×10 <sup>-58</sup>  |
| Lysine/AAs                 | 0.32            | 162.79  | 5.01×10 <sup>70</sup>   | 0.72            | -35.28  | 4.79×10 <sup>-16</sup>  |
| Histidine/AAs              | 0.13            | 293.47  | 2.84×10 <sup>127</sup>  | 0.65            | -33.88  | 1.94×10 <sup>-15</sup>  |
| Phenylalanine/AAs          | 0.13            | 357.61  | 2.03×10 <sup>155</sup>  | 0.25            | -112.83 | 9.99×10 <sup>-50</sup>  |
| Tyrosine/AAs               | 0.22            | -208.14 | 4.05×10 <sup>-91</sup>  | 0.45            | 76.89   | 2.48×10 <sup>33</sup>   |
| Tryptophan/AAs             | 0.20            | 269.59  | 1.21×10 <sup>177</sup>  | 0.40            | 112.017 | 4.45×10 <sup>48</sup>   |
| Age                        | 0.26            | 0.08    | 1.086                   | 0.97            | 0.0021  | 1.0021                  |
| %BF                        | <b>0.052</b>    | -0.38   | 0.69                    | 0.036           | -0.19   | 0.83                    |
| VFA                        | 0.62            | -0.01   | 0.99                    | 0.76            | 0.0063  | 1.0063                  |
